# Supplementary material for: Winter Cereal Reactions to Common Root Rot and Crown Rot Pathogens in the Field
Source: MDPI journal article supplement (doi:10.3390/agronomy12102571), 2022-10-19
Supplement: s1 [file s1]

## Supplementary Material

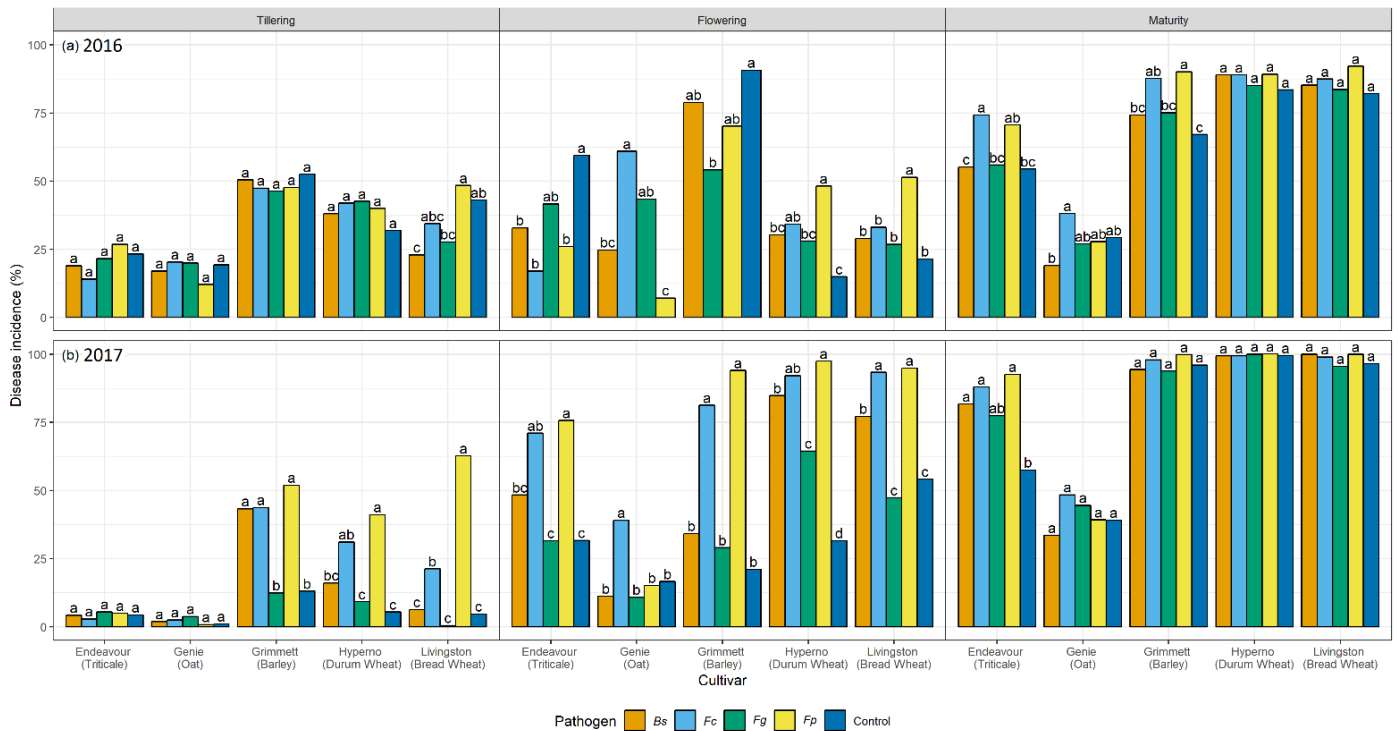

**Figure S1.** Average percentage of incidence of discoloured stems per plant between pathogen within a cultivar and harvest time interaction in 2016 (a) and 2017 (b). Different letters represent significant differences between pathogens within a cultivar and harvest time at  $\alpha < 0.05$ . Treatments include *Fusarium pseudograminearum* strains (Fp), *F. culmorum* (Fc), *F. graminearum* (Fg), *Bipolaris sorokiniana* (Bs), and one non-inoculated control for each host.

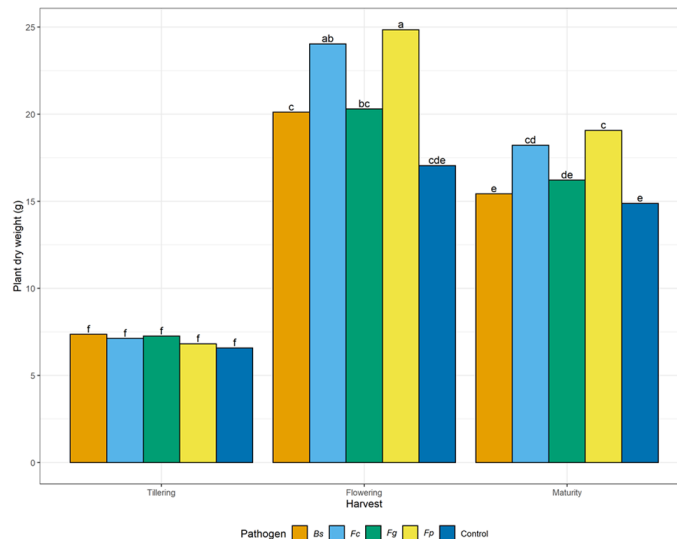

**Figure S2.** Average value of plant dry weight for the pathogen within harvest time interaction in 2016. Treatments include *Fusarium pseudograminearum* (Fp), *F. culmorum* (Fc), *F. graminearum* (Fg), *Bipolaris sorokiniana* (Bs) and non-inoculated control for each host. Different letters represent significant differences between pathogens within harvest time at  $\alpha < 0.05$ .

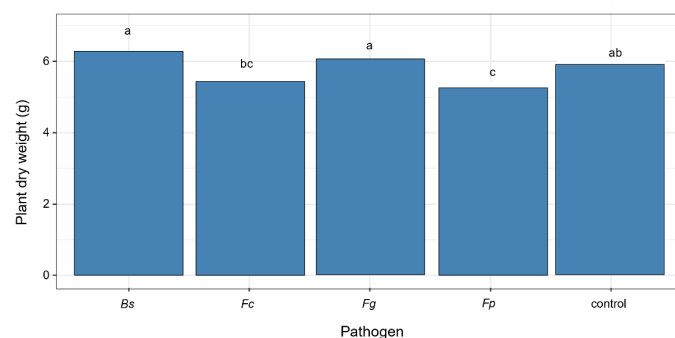

**Figure S3.** Average value of plant dry weight for each pathogen effect for the 2017 field trial. Treatments include *Fusarium pseudograminearum* (Fp), *F. culmorum* (Fc), *F. graminearum* (Fg), *Bipolaris sorokiniana* (Bs) and the non-inoculated control. Different letters represent significant differences between pathogens at  $\alpha < 0.05$ .

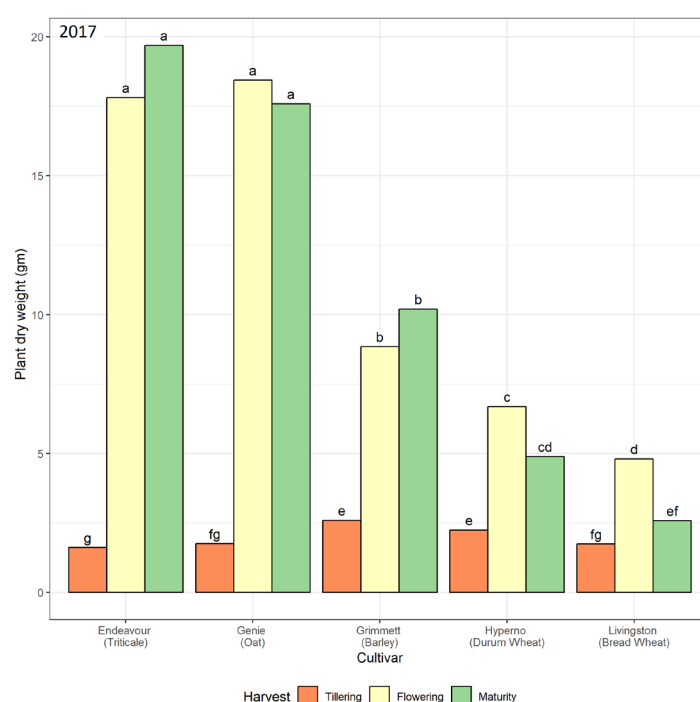

**Figure S4.** Average value of plant dry weight for cultivar at each harvest time for the 2017 field trial. Different letters represent significant differences between cultivars and harvest time at  $\alpha < 0.05$ .

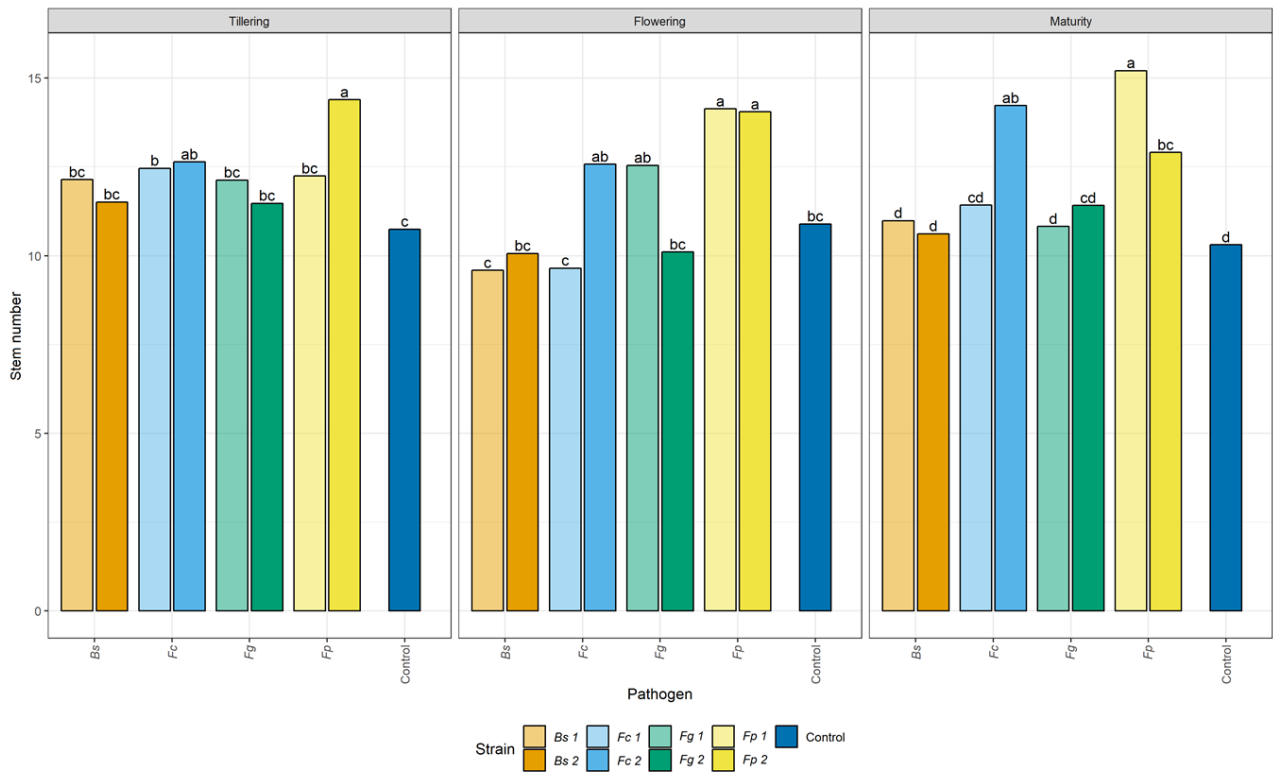

**Figure S5.** Average value of stem number for pathogens and strains at different harvest times for the 2016 field trial. Treatments include *Fusarium pseudograminearum* (Fp), *F. culmorum* (Fc), *F. graminearum* (Fg), *Bipolaris sorokiniana* (Bs) and the non-inoculated control. Different letters represent significant differences between pathogens within harvest time at  $\alpha < 0.05$ .

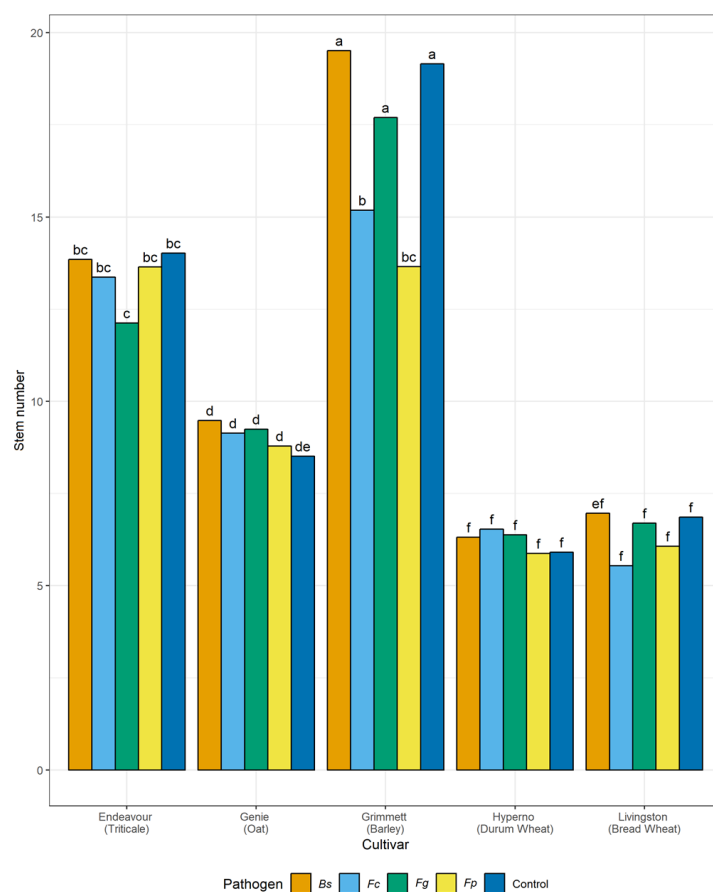

**Figure S6.** Average value of stem number for pathogens by cultivars interaction for the 2017 field trial. Treatments include *Fusarium pseudograminearum* (Fp), *F. culmorum* (Fc), *F. graminearum* (Fg), *Bipolaris sorokiniana* (Bs) and the non-inoculated control. Different letters represent significant differences between pathogens and cultivars at  $\alpha < 0.05$ .

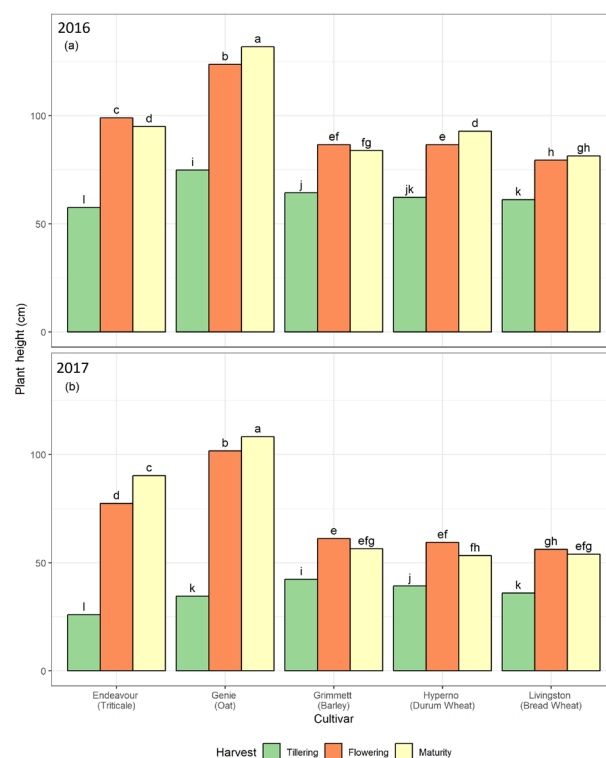

**Figure S7.** Average value of plant height for cultivar at each harvest time for the 2016 (a) and 2017 (b) field trials. Different letters represent significant differences between cultivars within harvest time at  $\alpha < 0.05$ .

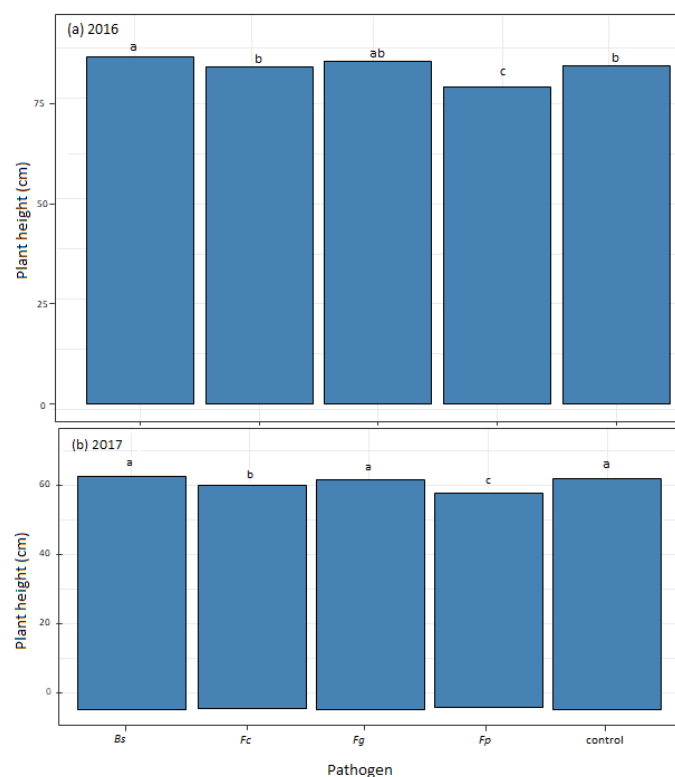

**Figure S8.** Average value of plant height for each pathogen effect across the cultivars for the 2016 (a) and 2017 (b) field trials. Treatments include *Fusarium pseudograminearum* strains (Fp), *F. culmorum* (Fc), *F. graminearum* (Fg), *Bipolaris sorokiniana* (Bs) and the non-inoculated control. Different letters represent significant differences between pathogens at  $\alpha < 0.05$ .

**Table S1.** Monthly rainfall (mm) for 2016 and 2017 Toowoomba Airport station <http://www.bom.gov.au/climate/data> (accessed on 28 August 2019). Station Number: 041529; State: QLD; Opened: 1996; Latitude: 27.54°S; Longitude: 151.91°E; Elevation: 641 m. (The total amount of the monthly rainfall of the growing season is indicated in bold).

| Year        | Monthly Rainfall (mm) |      |       |      |      |       |             |             |              |              |             |              | Total Annual Rainfall |
|-------------|-----------------------|------|-------|------|------|-------|-------------|-------------|--------------|--------------|-------------|--------------|-----------------------|
|             | Jan                   | Feb  | Mar   | Apr  | May  | Jun   | Jul         | Aug         | Sep          | Oct          | Nov         | Dec          |                       |
| <b>2016</b> | 82.2                  | 79.6 | 70.2  | 6.4  | 19.0 | 109.6 | <b>40.4</b> | <b>54.8</b> | <b>104.0</b> | <b>29.0</b>  | <b>25.0</b> | <b>33.8</b>  | 654.0                 |
| <b>2017</b> | 93.4                  | 21.2 | 313.6 | 20.6 | 14.4 | 35.8  | <b>26.4</b> | <b>2.0</b>  | <b>1.0</b>   | <b>150.4</b> | <b>26.0</b> | <b>104.0</b> | 808.8                 |

**Table S2.** ANOVA table for analysis of discoloured stems per plant (incidence of discoloured stems) of five winter cereals colonised by the four crown rot and common root rot pathogens in the 2016 field trial. Mean separations were described using  $\alpha < 0.05$ .

| Term                                | Num. <sup>a</sup> | Den. DF <sup>b</sup> | <i>f</i> -value | <i>p</i> -value |
|-------------------------------------|-------------------|----------------------|-----------------|-----------------|
| (Intercept)                         | 1                 | 2.0                  | 247.40          | 0.004           |
| Harvest                             | 2                 | 224.0                | 315.00          | <0.001          |
| Cultivar                            | 4                 | 221.0                | 88.22           | <0.001          |
| Pathogen                            | 4                 | 220.8                | 5.16            | 0.001           |
| Harvest: Cultivar                   | 8                 | 224.4                | 21.66           | <0.001          |
| Pathogen: Strain                    | 4                 | 222.2                | 2.28            | 0.061           |
| Harvest: Pathogen                   | 8                 | 223.7                | 1.11            | 0.360           |
| Cultivar: Pathogen                  | 16                | 220.5                | 2.09            | 0.010           |
| Harvest: Pathogen: Strain           | 8                 | 225.6                | 1.93            | 0.056           |
| Cultivar: Pathogen: Strain          | 16                | 221.5                | 0.65            | 0.841           |
| Harvest: Cultivar: Pathogen         | 30                | 224.1                | 1.82            | 0.008           |
| Harvest: Cultivar: Pathogen: Strain | 25                | 223.5                | 1.25            | 0.197           |

**Table S3.** ANOVA table for analysis of discoloured stems per plant (incidence of discoloured stems) of five winter cereals colonised by the four crown rot and common root rot pathogens in the 2017 field trial. Mean separations were described using  $\alpha < 0.05$ .

| Term                        | Num. <sup>a</sup> | Den. DF <sup>b</sup> | <i>f</i> -value | <i>p</i> -value |
|-----------------------------|-------------------|----------------------|-----------------|-----------------|
| (Intercept)                 | 1                 | 2.0                  | 0.14            | 0.741           |
| Harvest                     | 2                 | 146.1                | 710.90          | <0.001          |
| Cultivar                    | 4                 | 146.3                | 134.80          | <0.001          |
| Pathogen                    | 4                 | 146.1                | 45.88           | <0.001          |
| Harvest: Cultivar           | 8                 | 146.4                | 12.39           | <0.001          |
| Harvest: Pathogen           | 8                 | 146.2                | 7.52            | <0.001          |
| Cultivar: Pathogen          | 16                | 146.4                | 3.61            | <0.001          |
| Harvest: Cultivar: Pathogen | 32                | 146.5                | 2.20            | 0.001           |

<sup>a</sup>Num.: Numerator degrees of freedom. <sup>b</sup>Den. DF: Denominator degrees of freedom.

**Table S4.** ANOVA table for analysis of disease severity on the stems ratings of five winter cereals colonised by the four crown rot and common root rot pathogens in the 2016 field trial. Mean separations were described using  $\alpha < 0.05$ .

| Term                                | Num. <sup>a</sup> | Den. DF <sup>b</sup> | f-value | p-value |
|-------------------------------------|-------------------|----------------------|---------|---------|
| (Intercept)                         | 1                 | 1.9                  | 1148.00 | 0.001   |
| Harvest                             | 1                 | 127.6                | 139.70  | <0.001  |
| Cultivar                            | 4                 | 127.1                | 40.98   | <0.001  |
| Pathogen                            | 4                 | 126.9                | 46.93   | <0.001  |
| Harvest: Cultivar                   | 4                 | 127.1                | 12.45   | <0.001  |
| Pathogen: Strain                    | 4                 | 128.6                | 3.10    | 0.018   |
| Harvest: Pathogen                   | 4                 | 127.9                | 22.13   | <0.001  |
| Cultivar: Pathogen                  | 16                | 127.1                | 5.06    | <0.001  |
| Harvest: Pathogen: Strain           | 4                 | 130.9                | 2.21    | 0.071   |
| Cultivar: Pathogen: Strain          | 16                | 128.6                | 1.63    | 0.070   |
| Harvest: Cultivar: Pathogen         | 14                | 128.5                | 2.52    | 0.003   |
| Harvest: Cultivar: Pathogen: Strain | 9                 | 126.8                | 3.04    | 0.002   |

**Table S5.** ANOVA table for analysis of disease severity on the stems ratings of five winter cereals colonised by the four crown rot and common root rot pathogens in the 2017 field trial. Mean separations were described using  $\alpha < 0.05$ .

| Term                        | Num. <sup>a</sup> | Den. DF <sup>b</sup> | f-value | p-value |
|-----------------------------|-------------------|----------------------|---------|---------|
| (Intercept)                 | 1                 | 144.4                | 7528.00 | <0.001  |
| Harvest                     | 2                 | 144.4                | 173.50  | <0.001  |
| Cultivar                    | 4                 | 144.6                | 53.20   | <0.001  |
| Pathogen                    | 4                 | 144.4                | 60.57   | <0.001  |
| Harvest: Cultivar           | 8                 | 144.7                | 7.82    | <0.001  |
| Harvest: Pathogen           | 8                 | 144.5                | 11.45   | <0.001  |
| Cultivar: Pathogen          | 16                | 144.7                | 6.91    | <0.001  |
| Harvest: Cultivar: Pathogen | 32                | 144.7                | 2.01    | 0.003   |

<sup>a</sup>Num.: Numerator degrees of freedom. <sup>b</sup>Den. DF: Denominator degrees of freedom.

**Table S6.** ANOVA table for analysis of sub-crown internode rating of five winter cereals colonised by the four crown rot and common root rot pathogens in the 2016 field trial. Mean separations of  $\alpha < 0.05$ .

| Term                                 | Num. <sup>a</sup> | Den. DF <sup>b</sup> | f-value | p-value |
|--------------------------------------|-------------------|----------------------|---------|---------|
| (Intercept)                          | 1                 | 1.8                  | 5650.00 | <0.001  |
| Harvest                              | 2                 | 223.8                | 121.10  | <0.001  |
| Cultivars                            | 4                 | 210.4                | 26.11   | <0.001  |
| Pathogen                             | 4                 | 211.9                | 69.64   | <0.001  |
| Harvest: Cultivars                   | 8                 | 225.1                | 25.46   | <0.001  |
| Pathogen: Strain                     | 4                 | 214.5                | 3.67    | 0.006   |
| Harvest: Pathogen                    | 8                 | 226.6                | 1.85    | 0.068   |
| Genotype: Pathogen                   | 16                | 211.1                | 4.38    | <0.001  |
| Harvest: Pathogen: Strain            | 8                 | 229.2                | 1.11    | 0.360   |
| Cultivar: Pathogen: Strain           | 16                | 213.3                | 1.36    | 0.162   |
| Harvest: Cultivars: Pathogen         | 30                | 226.7                | 1.31    | 0.136   |
| Harvest: Cultivars: Pathogen: Strain | 25                | 227.4                | 0.64    | 0.908   |

**Table S7.** ANOVA table for analysis of sub-crown internode rating of five winter cereals colonised by the four crown rot and common root rot pathogens in the 2017 field trial. Mean separations of  $\alpha < 0.05$ .

| Term                       | Num. <sup>a</sup> | Den. DF <sup>b</sup> | f-value | p-value |
|----------------------------|-------------------|----------------------|---------|---------|
| (Intercept)                | 1                 | 2.0                  | 116.40  | 0.009   |
| Harvest                    | 2                 | 143.2                | 179.00  | <0.001  |
| Cultivar                   | 4                 | 143.1                | 36.74   | <0.001  |
| Pathogen                   | 4                 | 143.1                | 37.47   | <0.001  |
| Harvest: Cultivar          | 8                 | 143.7                | 5.24    | <0.001  |
| Harvest: Pathogen          | 8                 | 143.6                | 1.19    | 0.307   |
| Cultivars: Pathogen        | 16                | 143.6                | 3.16    | <0.001  |
| Cultivar: Pathogen: Strain | 32                | 144.2                | 0.87    | 0.664   |

<sup>a</sup>Num.: Numerator degrees of freedom. <sup>b</sup>Den. DF: Denominator degrees of freedom.

**Table S8.** ANOVA table for analysis of plant dry weight of five winter cereals colonised by the four crown rot and common root rot pathogens in the 2016 field trial. Mean separations of  $\alpha < 0.05$ .

| Term                                | Num. <sup>a</sup> | Den. DF <sup>b</sup> | f-value  | p-value |
|-------------------------------------|-------------------|----------------------|----------|---------|
| (Intercept)                         | 1                 | 214.9                | 44170.00 | <0.001  |
| Harvest                             | 2                 | 223.7                | 732.70   | <0.001  |
| Cultivar                            | 4                 | 214.0                | 88.65    | <0.001  |
| Pathogen                            | 4                 | 214.4                | 4.37     | 0.002   |
| Harvest: Cultivar                   | 8                 | 224.7                | 20.99    | <0.001  |
| Pathogen: Strain                    | 4                 | 216.4                | 1.44     | 0.223   |
| Harvest: Pathogen                   | 8                 | 223.6                | 2.65     | 0.008   |
| Cultivar: Pathogen                  | 16                | 213.4                | 0.42     | 0.976   |
| Harvest: Pathogen: Strain           | 8                 | 226.6                | 1.08     | 0.376   |
| Cultivar: Pathogen: Strain          | 16                | 214.6                | 1.03     | 0.421   |
| Harvest: Cultivar: Pathogen         | 30                | 224.3                | 0.69     | 0.884   |
| Harvest: Cultivar: Pathogen: Strain | 25                | 222.3                | 0.88     | 0.633   |

**Table S9.** ANOVA table for analysis of plant dry weight of five winter cereals colonised by the four crown rot and common root rot pathogens in the 2017 field trial. Mean separations of  $\alpha < 0.05$ .

| Term                        | Num. <sup>a</sup> | Den. DF <sup>b</sup> | f-value  | p-value |
|-----------------------------|-------------------|----------------------|----------|---------|
| (Intercept)                 | 1                 | 2.0                  | 11550.00 | <0.001  |
| Harvest                     | 2                 | 143.3                | 939.00   | <0.001  |
| Cultivar                    | 4                 | 143.6                | 178.60   | <0.001  |
| Pathogen                    | 4                 | 143.2                | 4.78     | 0.001   |
| Harvest: Cultivar           | 8                 | 143.8                | 63.00    | <0.001  |
| Harvest: Pathogen           | 8                 | 143.4                | 1.13     | 0.349   |
| Cultivar: Pathogen          | 16                | 143.8                | 0.92     | 0.549   |
| Harvest: Cultivar: Pathogen | 32                | 144.0                | 1.01     | 0.465   |

<sup>a</sup>Num.: Numerator degrees of freedom. <sup>b</sup>Den. DF: Denominator degrees of freedom.



**Table S10.** ANOVA table for analysis of stem number of five winter cereals colonised by the four crown rot and common root rot pathogens in the 2016 field trial. Mean separations of  $\alpha < 0.05$ .

| Term                                | Num. <sup>a</sup> | Den. DF <sup>b</sup> | F-value  | p-value |
|-------------------------------------|-------------------|----------------------|----------|---------|
| (Intercept)                         | 1                 | 208.6                | 32050.00 | <0.001  |
| Harvest                             | 2                 | 215.4                | 0.95     | 0.390   |
| Cultivar                            | 4                 | 207.9                | 116.80   | <0.001  |
| Pathogen                            | 4                 | 208.2                | 16.41    | <0.001  |
| Harvest: Cultivar                   | 8                 | 216.2                | 5.19     | <0.001  |
| Pathogen: Strain                    | 4                 | 210.2                | 2.05     | 0.088   |
| Harvest: Pathogen                   | 8                 | 215.2                | 1.31     | 0.240   |
| Cultivar: Pathogen                  | 16                | 207.4                | 1.03     | 0.429   |
| Harvest: Pathogen: Strain           | 8                 | 218.1                | 2.31     | 0.021   |
| Cultivar: Pathogen: Strain          | 16                | 208.7                | 1.16     | 0.305   |
| Harvest: Genotype: Pathogen         | 30                | 215.8                | 0.90     | 0.627   |
| Harvest: Cultivar: Pathogen: Strain | 25                | 214.2                | 1.13     | 0.312   |

**Table S11.** ANOVA table for analysis of stem number of five winter cereals colonised by the four crown rot and common root rot pathogens in the 2017 field trial. Mean separations of  $\alpha < 0.05$ .

| Term                        | Num.a | Den. DFb | F-value | p-value |
|-----------------------------|-------|----------|---------|---------|
| (Intercept)                 | 1     | 2.0      | 0.14    | 0.741   |
| Harvest                     | 2     | 146.1    | 710.90  | <0.001  |
| Cultivar                    | 4     | 146.3    | 134.80  | <0.001  |
| Pathogen                    | 4     | 146.1    | 45.88   | <0.001  |
| Harvest: Cultivar           | 8     | 146.4    | 12.39   | <0.001  |
| Harvest: Pathogen           | 8     | 146.2    | 7.52    | <0.001  |
| Cultivar: Pathogen          | 16    | 146.4    | 3.61    | <0.001  |
| Harvest: Cultivar: Pathogen | 32    | 146.5    | 2.20    | 0.001   |
| Term                        | Num.a | Den. DFb | F-value | p-value |
| (Intercept)                 | 1     | 2.0      | 0.14    | 0.741   |
| Harvest                     | 2     | 146.1    | 710.90  | <0.001  |
| Cultivar                    | 4     | 146.3    | 134.80  | <0.001  |
| Pathogen                    | 4     | 146.1    | 45.88   | <0.001  |
| Harvest: Cultivar           | 8     | 146.4    | 12.39   | <0.001  |
| Harvest: Pathogen           | 8     | 146.2    | 7.52    | <0.001  |
| Cultivar: Pathogen          | 16    | 146.4    | 3.61    | <0.001  |
| Harvest: Cultivar: Pathogen | 32    | 146.5    | 2.20    | 0.001   |
| Term                        | Num.a | Den. DFb | F-value | p-value |
| (Intercept)                 | 1     | 2.0      | 0.14    | 0.741   |
| Harvest                     | 2     | 146.1    | 710.90  | <0.001  |
| Cultivar                    | 4     | 146.3    | 134.80  | <0.001  |
| Pathogen                    | 4     | 146.1    | 45.88   | <0.001  |
| Harvest: Cultivar           | 8     | 146.4    | 12.39   | <0.001  |
| Harvest: Pathogen           | 8     | 146.2    | 7.52    | <0.001  |
| Cultivar: Pathogen          | 16    | 146.4    | 3.61    | <0.001  |
| Harvest: Cultivar: Pathogen | 32    | 146.5    | 2.20    | 0.001   |

<sup>a</sup>Num.: Numerator degrees of freedom. <sup>b</sup>Den. DF: Denominator degrees of freedom.

**Table S12.** ANOVA table for analysis of plant height of five winter cereals colonised by the four crown rot and common root rot pathogens in the 2016 field trial. Mean separations of  $\alpha < 0.05$ .

| Term                                | Num. <sup>a</sup> | Den. DF <sup>b</sup> | F-value  | p-value |
|-------------------------------------|-------------------|----------------------|----------|---------|
| (Intercept)                         | 1                 | 1.9                  | 52190.00 | <0.001  |
| Harvest                             | 2                 | 206.1                | 2120.00  | <0.001  |
| Cultivar                            | 4                 | 203.2                | 588.50   | <0.001  |
| Pathogen                            | 4                 | 202.8                | 25.03    | <0.001  |
| Harvest: Cultivar                   | 8                 | 206.4                | 96.01    | <0.001  |
| Pathogen: Strain                    | 4                 | 204.4                | 1.97     | 0.100   |
| Harvest: Pathogen                   | 8                 | 205.5                | 0.87     | 0.546   |
| Cultivar: Pathogen                  | 16                | 202.6                | 1.49     | 0.108   |
| Harvest: Pathogen: Strain           | 8                 | 207.6                | 0.42     | 0.908   |
| Cultivar: Pathogen: Strain          | 16                | 203.9                | 1.62     | 0.066   |
| Harvest: Cultivar: Pathogen         | 30                | 206.0                | 1.12     | 0.309   |
| Harvest: Cultivar: Pathogen: Strain | 25                | 206.4                | 0.83     | 0.699   |

**Table S13.** ANOVA table for analysis of plant height of five winter cereals colonised by the four crown rot and common root rot pathogens in the 2017 field trial. Mean separations of  $\alpha < 0.05$ .

| Term                        | Num. <sup>a</sup> | Den. DF <sup>b</sup> | F-value  | p-value |
|-----------------------------|-------------------|----------------------|----------|---------|
| (Intercept)                 | 1                 | 1.9                  | 23370.00 | <0.001  |
| Harvest                     | 2                 | 120.7                | 2271.00  | <0.001  |
| Cultivar                    | 4                 | 117.9                | 227.10   | <0.001  |
| Pathogen                    | 4                 | 117.2                | 6.43     | <0.001  |
| Harvest: Cultivar           | 8                 | 132.9                | 143.40   | <0.001  |
| Harvest: Pathogen           | 8                 | 119.0                | 1.47     | 0.177   |
| Cultivar: Pathogen          | 16                | 116.8                | 1.23     | 0.253   |
| Harvest: Cultivar: Pathogen | 22                | 118.2                | 1.38     | 0.138   |

<sup>a</sup>Num.: Numerator degrees of freedom. <sup>b</sup>Den. DF: Denominator degrees of freedom.

**Table S14.** Comparison of disease incidence (%) and DNA detection frequency (%) (**in bold**) of *Bipolaris sorokiniana* (Bs), *Fusarium culmorum* (Fc), *F. graminearum* (Fg), *F. pseudograminearum* (Fp) and non-inoculated control treatments ( $n=15$  for each of the four inoculation treatments and one non-inoculated control).

| Frequency of detection of <i>Fusarium</i> spp. and <i>B. sorokiniana</i> DNA detection (%) <sup>a</sup> / Incidence of disease symptoms (%) <sup>b</sup> |               |     |             |    |              |     |             |     |                |     |
|----------------------------------------------------------------------------------------------------------------------------------------------------------|---------------|-----|-------------|----|--------------|-----|-------------|-----|----------------|-----|
| Treatment                                                                                                                                                | cv. Endeavour |     | cv. Genie   |    | cv. Grimmatt |     | cv. Hyperno |     | cv. Livingston |     |
| <i>Fp</i>                                                                                                                                                | <b>67.0</b>   | 100 | <b>47.0</b> | 73 | <b>80.0</b>  | 100 | <b>53.0</b> | 100 | <b>73.0</b>    | 100 |
| <i>Fc</i>                                                                                                                                                | <b>50.0</b>   | 100 | <b>73.0</b> | 93 | <b>47.0</b>  | 100 | <b>73.0</b> | 100 | <b>67.0</b>    | 100 |
| <i>Fg</i>                                                                                                                                                | <b>0.0</b>    | 93  | <b>13.0</b> | 80 | <b>0.0</b>   | 100 | <b>0.0</b>  | 100 | <b>0.0</b>     | 93  |
| <i>Bs</i>                                                                                                                                                | <b>13.0</b>   | 93  | <b>7.0</b>  | 73 | <b>13.0</b>  | 93  | <b>47.0</b> | 100 | <b>33.0</b>    | 100 |
| Control <sup>c</sup>                                                                                                                                     | <b>0.0</b>    | 96  | <b>0.0</b>  | 78 | <b>0.0</b>   | 97  | <b>0.0</b>  | 96  | <b>0.0</b>     | 97  |

<sup>a</sup> Percentage frequency of *Bipolaris sorokiniana*, *Fusarium culmorum*, *F. graminearum*, and *F. pseudograminearum* DNA in winter cereals cultivars (number of positive DNA detections / 15 = frequency of detection). <sup>b</sup> Percentage disease incidence of the plant that was used in the PCR assay (number of visually discoloured stems / 15 = incidence of symptoms treatment). <sup>c</sup> Non-inoculated control treatments for cv. Endeavour, cv. Genie, cv. Grimmatt, cv. Hyperno and cv. Livingston assessed with species-specific PCR primers for each pathogen.

**Table S15.** Comparison of average visual discolouration (VD) and DNA detection frequency of *Bipolaris sorokiniana* (Bs), *Fusarium culmorum* (Fc), *F. graminearum* (Fg), *F. pseudograminearum* (Fp) and non-inoculated control (%) (*n*=10-15 for each cultivar by inoculum combination).

| Isolate              | Cultivars  | (+) VD<br>(+) DNA<br>% <sup>a</sup> | (-) VD<br>(-) DNA<br>% <sup>b</sup> | (+) VD<br>(-) DNA<br>% <sup>c</sup> | (-) VD<br>(+) DNA<br>% <sup>d</sup> | Total<br>Sample<br>Number | Average<br>VD<br>(%) | Notes                        |
|----------------------|------------|-------------------------------------|-------------------------------------|-------------------------------------|-------------------------------------|---------------------------|----------------------|------------------------------|
| <i>Fp</i>            | Endeavour  | 66.7                                | 0.0                                 | 33.3                                | 0.0                                 | 15                        | 13                   |                              |
| <i>Fc</i>            | Endeavour  | 50.0                                | 0.0                                 | 50.0                                | 0.0                                 | 10                        | 7                    |                              |
| <i>Fg</i>            | Endeavour  | 0.0                                 | 8.3                                 | 91.7                                | 0.0                                 | 12                        | 5                    | Most have 5% VD <sup>f</sup> |
| <i>Bs</i>            | Endeavour  | 13.3                                | 6.7                                 | 80                                  | 0.0                                 | 15                        | 5                    | Most have 5%VD               |
| Control <sup>e</sup> | Endeavour  | 0.0                                 | 6.7                                 | 93.3                                | 0.0                                 | 15                        | 5                    | Most have 5%VD               |
| <i>Fp</i>            | Genie      | 33.3                                | 13.3                                | 40.0                                | 13.3                                | 15                        | 4                    | Most have 5%VD               |
| <i>Fc</i>            | Genie      | 66.7                                | 0.0                                 | 26.7                                | 6.7                                 | 15                        | 6                    | Most have 5%VD               |
| <i>Fg</i>            | Genie      | 0.0                                 | 13.3                                | 73.3                                | 13.3                                | 15                        | 4                    | Most have 5%VD               |
| <i>Bs</i>            | Genie      | 0.0                                 | 20.0                                | 73.3                                | 6.7                                 | 15                        | 4                    | Most have 5%VD               |
| Control              | Genie      | 0.0                                 | 26.7                                | 73.3                                | 0.0                                 | 15                        | 4                    | Most have 5%VD               |
| <i>Fp</i>            | Grimmett   | 80.0                                | 0.0                                 | 20.0                                | 0.0                                 | 15                        | 39                   |                              |
| <i>Fc</i>            | Grimmett   | 40.0                                | 0.0                                 | 60.0                                | 0.0                                 | 15                        | 11                   |                              |
| <i>Fg</i>            | Grimmett   | 0.0                                 | 0.0                                 | 100                                 | 0.0                                 | 15                        | 6                    | Most have 5%VD               |
| <i>Bs</i>            | Grimmett   | 13.3                                | 6.7                                 | 80.0                                | 0.0                                 | 15                        | 5                    | Most have 5%VD               |
| Control              | Grimmett   | 0.0                                 | 6.7                                 | 93.3                                | 0.0                                 | 15                        | 5                    | Most have 5%VD               |
| <i>Fp</i>            | Hyperno    | 60.0                                | 0.0                                 | 40.0                                | 0.0                                 | 15                        | 56                   |                              |
| <i>Fc</i>            | Hyperno    | 73.3                                | 0.0                                 | 26.7                                | 0.0                                 | 15                        | 24                   |                              |
| <i>Fg</i>            | Hyperno    | 0.0                                 | 0.0                                 | 100                                 | 0.0                                 | 15                        | 5                    | All have 5% VD               |
| <i>Bs</i>            | Hyperno    | 40.0                                | 0.0                                 | 60.0                                | 0.0                                 | 15                        | 10                   |                              |
| Control              | Hyperno    | 0.0                                 | 20.0                                | 80.0                                | 0.0                                 | 15                        | 5                    | Most have 5%VD               |
| <i>Fp</i>            | Livingston | 71.4                                | 0.0                                 | 28.6                                | 0.0                                 | 14                        | 39                   |                              |
| <i>Fc</i>            | Livingston | 73.3                                | 0.0                                 | 26.7                                | 0.0                                 | 15                        | 12                   |                              |
| <i>Fg</i>            | Livingston | 0.0                                 | 6.7                                 | 93.3                                | 0.0                                 | 15                        | 5                    | Most have 5%VD               |
| <i>Bs</i>            | Livingston | 33.3                                | 0.0                                 | 66.7                                | 0.0                                 | 15                        | 5                    | Most have 5%VD               |
| Control              | Livingston | 0.0                                 | 6.7                                 | 93.3                                | 0.0                                 | 15                        | 8                    | Most have 5%VD               |

a Percentage of the plants with visual symptoms and DNA of *Fusarium* Species and *Bipolaris sorokiniana* in five winter cereal species cultivars; b Percentage of the plants without visual symptoms or DNA of *Fusarium* Species and *Bipolaris sorokiniana* in five winter cereal species cultivars; c Percentage of the plants with the visual symptom but no DNA of *Fusarium* Species and *Bipolaris sorokiniana* in five winter cereal species cultivars; d Percentage of the plants without visual symptoms but with DNA of *Fusarium* Species and *Bipolaris sorokiniana* in five winter cereal species cultivars.; e Non-inoculated control treatment; f Visual discolouration rating.
